# Supplementary material for: Automated standard dilution analysis using a four-port switching valve for fast inductively coupled plasma optical emission spectrometry determination
Source: Royal Society of Chemistry journal article supplement (doi:10.1039/d3ja00295k), 2023-01-01
Supplement: d3ja00295k1.pdf [file d3ja00295k1.pdf]

## Supplementary Material

# **Automated standard dilution analysis using a four-port switching valve for fast inductively coupled plasma optical emission spectrometry determinations**

Jesse R. Ingham, Bradley T. Jones and George L. Donati\*

Department of Chemistry, Wake Forest University,

Salem Hall, Box 7486, Winston-Salem, NC 27109

\*Corresponding author. Tel.: +1 336 758 4815; fax: +1 336 758 4656.

E-mail address: donatigl@wfu.edu (G. L. Donati)

**Figure S1.** SV4 system with sample loop and the four ports used for SDA-ICP-OES. See main text and Fig. 2 for additional details.

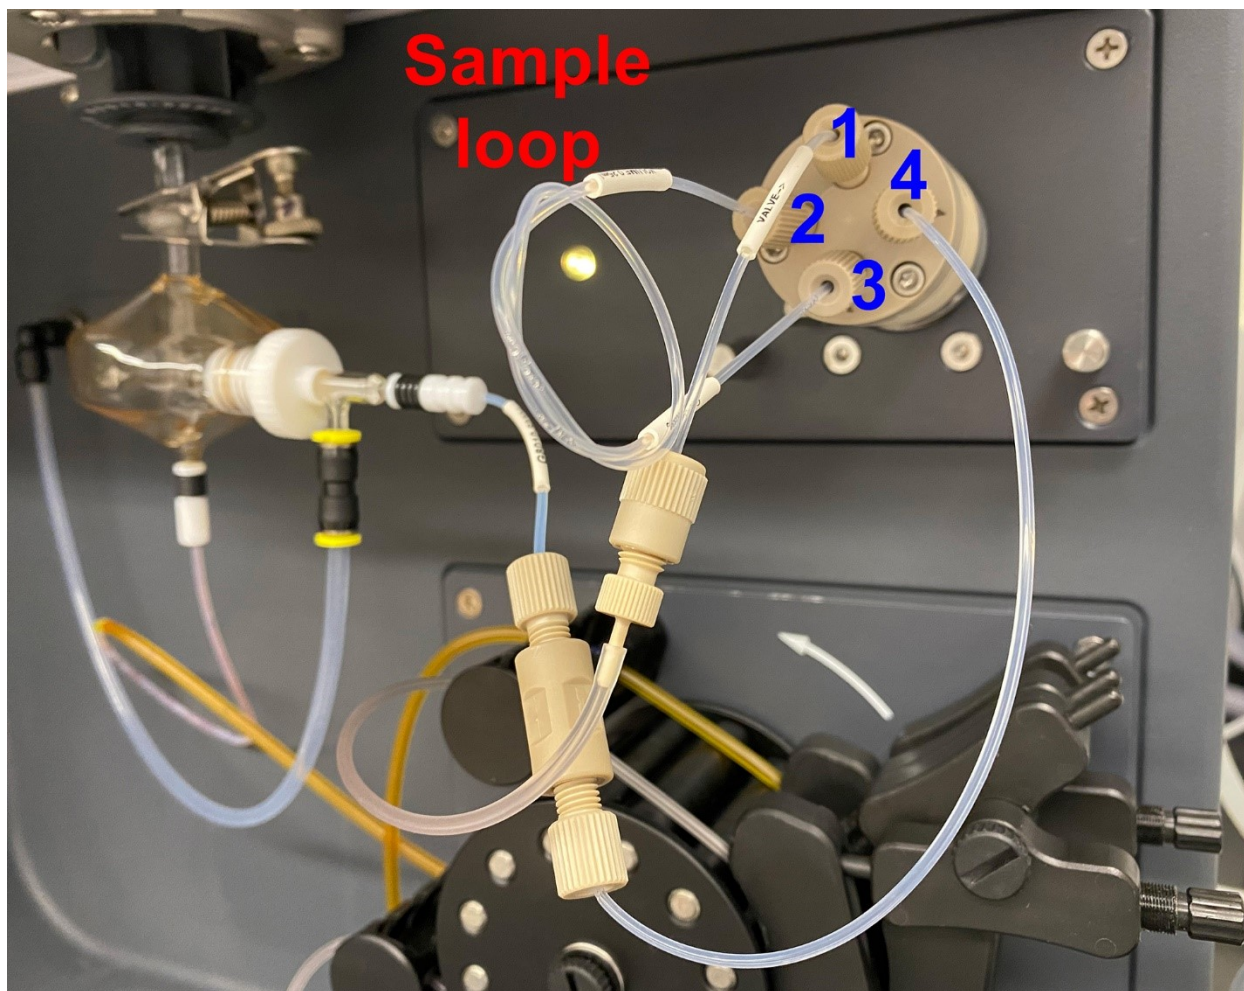

**Fig. S1.** SV4 system with sample loop and the four ports (1 - 4) used for SDA-ICP-OES. See main text and Fig. 2 for additional details.
